# Supplementary material
Source: HighWire-hosted journal article supplement (https://www.haematologica.org/content/suppl/2014/04/01/haematol.2013.099549)
Supplement: 2013_099549-Contributions.pdf [file 2013_099549-Contributions.pdf]

# haematologica *the hematology journal*

*author contribution form*

|                     |                                                                                         |
|---------------------|-----------------------------------------------------------------------------------------|
| <b>Title</b>        | <b>WHY METHYLATION IS NOT A MARKER PREDICTIVE OF RESPONSE TO HYPOMETHYLATING AGENTS</b> |
| <b>First author</b> | <i>Maria Teresa Voso, MD</i>                                                            |

According to the International Committee of Medical Journal Editors (ICMJE)

([http://www.icmje.org/ethical\\_1author.html](http://www.icmje.org/ethical_1author.html)):

*“Authorship credit should be based on: 1) substantial contributions to conception and design, acquisition of data, or analysis and interpretation of data; 2) drafting the article or revising it critically for important intellectual content; and 3) final approval of the version to be published. Authors should meet conditions 1, 2 and 3. Acquisition of funding, collection of data, or general supervision of the research group alone does not constitute authorship”.*

**The responsible author(s) of this manuscript confirm(s) that all persons designated as authors qualify for authorship, and that each author has participated sufficiently in the work to take public responsibility for appropriate portions of the content.**

*Specific contributions of each author are listed on page 2 of this document.*

## **Responsible author(s):**

*author(s) responsible for the integrity of the work as a whole*

Name: Maria Teresa Voso, MD.....  
Institute: Ematologia, Universita' Cattolica Sacro Cuore, Rome, Italy.....  
e-mail: mtvoso@rm.unicatt.it.....

**Author contributions (maximum 1 page):**

*Please describe the contributions of each author, indicating who was responsible for each part of the study and the preparation of the manuscript (collection of data, experiments, data analysis, generation of figures, collection of images, interpretation of data, preparation of the text, etc.)*

MTV: conceived and wrote the manuscript, generated the figures, received honoraria from Celgene

VS: wrote and reviewed the manuscript, received honoraria from Celgene, Novartis and Janssen

EF: wrote the manuscript, generated the figures, no COI to disclose

LF: wrote the manuscript, generated the figures, no COI to disclose

MC: wrote the manuscript, no COI to disclose

FG: wrote the manuscript, generated the figures, no COI to disclose

SH: wrote the manuscript, no COI to disclose

GL: wrote the manuscript, received honoraria from Celgene
